# Supplementary figures and images for: Synthesis of ZnO doped high valence S element and study of photogenerated charges properties
Source: Royal Society of Chemistry journal article supplement (doi:10.1039/c8ra07751g), 2019-01-01

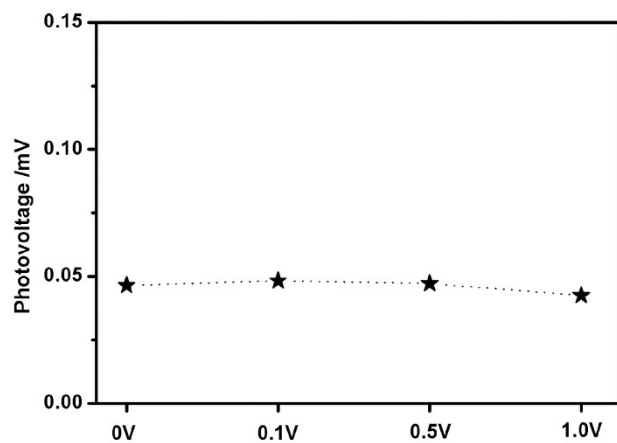

Figure S1. The SPS response value of S-ZnO at 0, 0.1, 0.5 and 1V.

Supplement: c8ra07751g1.pdf [file c8ra07751g1.pdf]
